# Supplementary material
Source: PubMed Central journal article supplement (PMC2614147)
Supplement: rsbl20080347s29.pdf [file rsbl20080347s29.pdf]

## Supplementary material and methods accompanying:

### Immune activation suppresses plasma testosterone level; A meta-analysis

Jelle J. Boonekamp<sup>1</sup>, Albert H.F. Ros<sup>2</sup> & Simon Verhulst<sup>1,\*</sup>

1. Behavioural Biology, University of Groningen,  
P.O.Box 14, 9750 AA Haren, the Netherlands
2. Eco-Ethology Research Unit, ISPA, Lisbon, Portugal

\* correspondence: s.verhulst@rug.nl

#### *1. Search and selection of studies*

We searched using the ISI Web of Knowledge and Medline (NCBI), using combinations of multiple keywords: e.g. testosterone, androgens, parasites, immunocompetence, srbc, lps, vaccination and sickness behavior, and by checking references of the relevant papers.

We selected studies that used adult male subjects and included an *in vivo* immune challenge followed by T plasma measurements. More specifically, studies were included in the meta-analysis when they satisfied the following criteria: (1) the immune system was challenged experimentally using parasites, viruses, or non-living antigens, and testosterone was subsequently measured. (2) The effect of the immune challenge could be compared with a proper control group, thus studies that used each individual as a 'self' control, without controlling for possible time-period effects, were excluded. (3) It had to be possible to extract the data in a way suitable for the meta-analysis.

#### *2. Effect size calculations*

For each experiment included in the meta-analysis we here describe how the effect size ( $r$ ) was calculated. Numbers correspond to study numbers in table 1 in the main paper. References to tables and figures refer to data sources in that particular study. We calculated test statistics ourselves when these were not provided, using  $n$ , mean and S.D. when available, or measuring these from graphs when necessary. We computed exact P-values when possible when only threshold values were reported (e.g.  $P < 0.05$ ).

- 1 Hales et al (2000):  $P$ -value from 2-sample  $t$ -test ( $t = 3.589$ ) calculated by us using  $n$ , means and standard deviations from paper (measured in figure 1a).
- 2 Barthelemy et al (2004): Average  $P$ -value from two successive sampling points ( $t$ -test statistics from paper:  $t_{14} = -3.7$ ,  $t_{14} = -3.86$ ).
- 3 Isseroff et al (1986):  $P$ -value from  $t$ -test ( $t = 9.293$ ) calculated by us using  $n$ , means and standard deviations in text from paper.
- 4 He et al (2000):  $P$ -value directly from author.
- 5 Weil et al (2006):  $P$ -value from test statistic from paper ( $F_{1,60} = 38.815$ ).
- 6 Kasilima et al (2004):  $P$ -value from test statistic ( $t = 0.998$ ) calculated by us, using  $n$ , weighed means and standard deviations. Multiple sample points were used (table 2b), and we averaged over sampling points (weighted by sample size).
- 7 O'Bryan et al (2000):  $P$ -value from  $t$ -test ( $t = 5.673$ ) calculated by us, using  $n$ , weighed means and standard deviations. Multiple sample points were used (figure 1c), and we averaged over sampling points (weighted by sample size).
- 8 O'Bryan et al (2000): See study 7 ( $t = 4.844$ , data from figure 2c).
- 9 Mutayoba et al (1997):  $P$ -value from  $t$ -test ( $t = 1.593$ ) calculated by us using  $n$ , means and

- standard deviations from paper (table 1).
- 10 Garamszegi et al (2004): *P*-value directly from paper.
- 11 Boltz et al (2004): *P*-value directly from paper. (*P*-value from *t*-test ( $t = 2.067$ ) calculated by us using *n*, means and standard deviations from table 1, resulted in  $P = 0.058$ . However, the authors report  $P < 0.05$ , a difference that could perhaps be a rounding effect. We assumed  $P = 0.05$  in our analyses).
- 12 Boltz et al (2007): *P*-value from *t*-test ( $t = 1.436$ ) calculated by us using *n*, means and standard deviations in table 4, comparing experimental groups Nonvac with Lvac.
- 13 DeVaney et al (1977): *P*-value directly from paper.
- 14 Verhulst et al (1999): *P*-value from ordered heterogeneity test-statistic from paper ( $F_{2,77} = 4.93$ ,  $r^2 P_c = 0.99$ ).

## References

- Barthelemy, M., Gabrion, C. & Petit, G. 2004 Reduction in testosterone concentration and its effect on the reproductive output of chronic malaria-infected male mice. *Parasitol Res* **93**, 475-481.
- Boltz, C. R., Boltz, D. A., Bunick, D., Scherba, G. & Bahr, J. M. 2007 Vaccination against the avian infectious bronchitis virus affects sperm concentration, sperm quality and blood testosterone concentrations in cockerels. *Brit Poultry Sci* **48**, 617-624.
- Boltz, D. A., Nakai, M. & Bahr, J. M. 2004 Avian infectious bronchitis virus: A possible cause of reduced fertility in the rooster. *Avian Dis* **48**, 909-915.
- Devaney, J. A., Elissalde, M. H., Steel, E. G., Hogan, B. F. & Delvarpetersen, H. 1977 Effect of Northern Fowl Mite, *Ornithonyssus-Sylviarum* (Canestrini and Fanzago) (Acarina Dermanyssidae) on White Leghorn Roosters. *Poultry Sci* **56**, 1585-1590.
- Garamszegi, L. Z., Møller, A. P., Torok, J., Michl, G., Peczely, P. & Richard, M. 2004 Immune challenge mediates vocal communication in a passerine bird: an experiment. *Behav Ecol* **15**, 148-157.
- Hales, K. H., Diemer, T., Ginde, S., Shankar, B. K., Roberts, M., Bosmann, H. B. & Hales, D. B. 2000 Diametric effects of bacterial endotoxin lipopolysaccharide on adrenal and leydig cell steroidogenic acute regulatory protein. *Endocrinology* **141**, 4000-4012.
- He, H. B., Ohta, N. & Kawaguchi, H. 2000 Effect of *Schistosoma japonicum* infection on serum testosterone levels in mice. *Zhongguo Ji Sheng Chong Xue Yu Ji Chong Bing Za Zhi*. **18**, 173-175.
- Isseroff, H., Sylvester, P. W. & Held, W. A. 1986 Effects of *Schistosoma mansoni* on androgen regulated gene-expression in the mouse. *Mol Biochem Parasitol* **18**, 401-412.
- Kasilima, Y. S., Wango, E. O., Kigundu, C. S., Mutayoba, B. M. & Nyindo, A. 2004 Plasma bioactive LH and testosterone profiles in male New Zealand rabbits experimentally infected with *Schistosoma mansoni*. *Acta Trop* **92**, 165-172.
- Mutayoba, B. M., OShaughnessy, P. J., Jeffcoate, I. A., Eckersall, P. D., Cestnik, V. & Holmes, P. H. 1997 Effect of experimental infection with *Trypanosoma congolense* and scrotal insulation on Leydig cell steroidogenesis in the ram. *Theriogenology* **48**, 411-422.
- O'Bryan, M. K., Schlatt, S., Phillips, D. J., de Kretser, D. M. & Hedger, M. P. 2000 Bacterial lipopolysaccharide-induced inflammation compromises testicular function at multiple levels in vivo. *Endocrinology* **141**, 238-246.
- Verhulst, S., Parmentier, H. K. & Dieleman, S. J. 1999 A trade-off between immunocompetence and sexual ornamentation in domestic fowl. *Proc. Natl. Acad. Sci. USA* **96**, 4478-4481.
- Weil, Z. M., Bowers, S. L., Pyter, L. M. & Nelson, R. J. 2006 Social interactions alter proinflammatory cytokine gene expression and behavior following endotoxin administration. *Brain Behav Immun* **20**, 72-79.
